# Supplementary material
Source: HighWire-hosted journal article supplement (https://erj.ersjournals.com/content/51/6/1800376)
Supplement: inline-supplementary-material-1 [file inline-supplementary-material-1.pdf]

## Supplement 1. EMBASE Search Strategy (July 3, 2017)

Database: Embase Classic+Embase <1947 to 2017 July 03>

Search Strategy:

- 
- 1 idiopathic pulmonary fibrosis.mp. or exp fibrosing alveolitis/
  - 2 cryptogenic fibrosing alveolitis.mp.
  - 3 idiopathic interstitial pneumonia.mp. or exp interstitial pneumonia/
  - 4 idiopathic fibrosing alveolitis.mp.
  - 5 pantoprazole/ or omeprazole/ or esomeprazole/ or exp proton pump inhibitor/ or rabeprazole/  
or histamine H2 receptor antagonist/ or proton pump inhibitor\*.mp. or lansoprazole/ or  
gastroesophageal reflux/ or gerd\* treatment.mp. [mp=title, abstract, heading word, drug trade  
name, original title, device manufacturer, drug manufacturer, device trade name, keyword,  
floating subheading word]
  - 6 anti-acid\*.mp. or exp antacid agent/
  - 7 ppi\*.mp.
  - 8 antiacid\*.mp.
  - 9 (mortality or survival or survive or death or die\*).mp. [mp=title, abstract, heading word,  
drug trade name, original title, device manufacturer, drug manufacturer, device trade name,  
keyword, floating subheading word]
  - 10 (1 or 2 or 3 or 4) and (5 or 6 or 7 or 8) and 9
