# Supplementary material
Source: HighWire-hosted journal article supplement (https://erj.ersjournals.com/content/51/6/1800376)

**Supplement 2.** Flow chart of the study selection for the methodological review

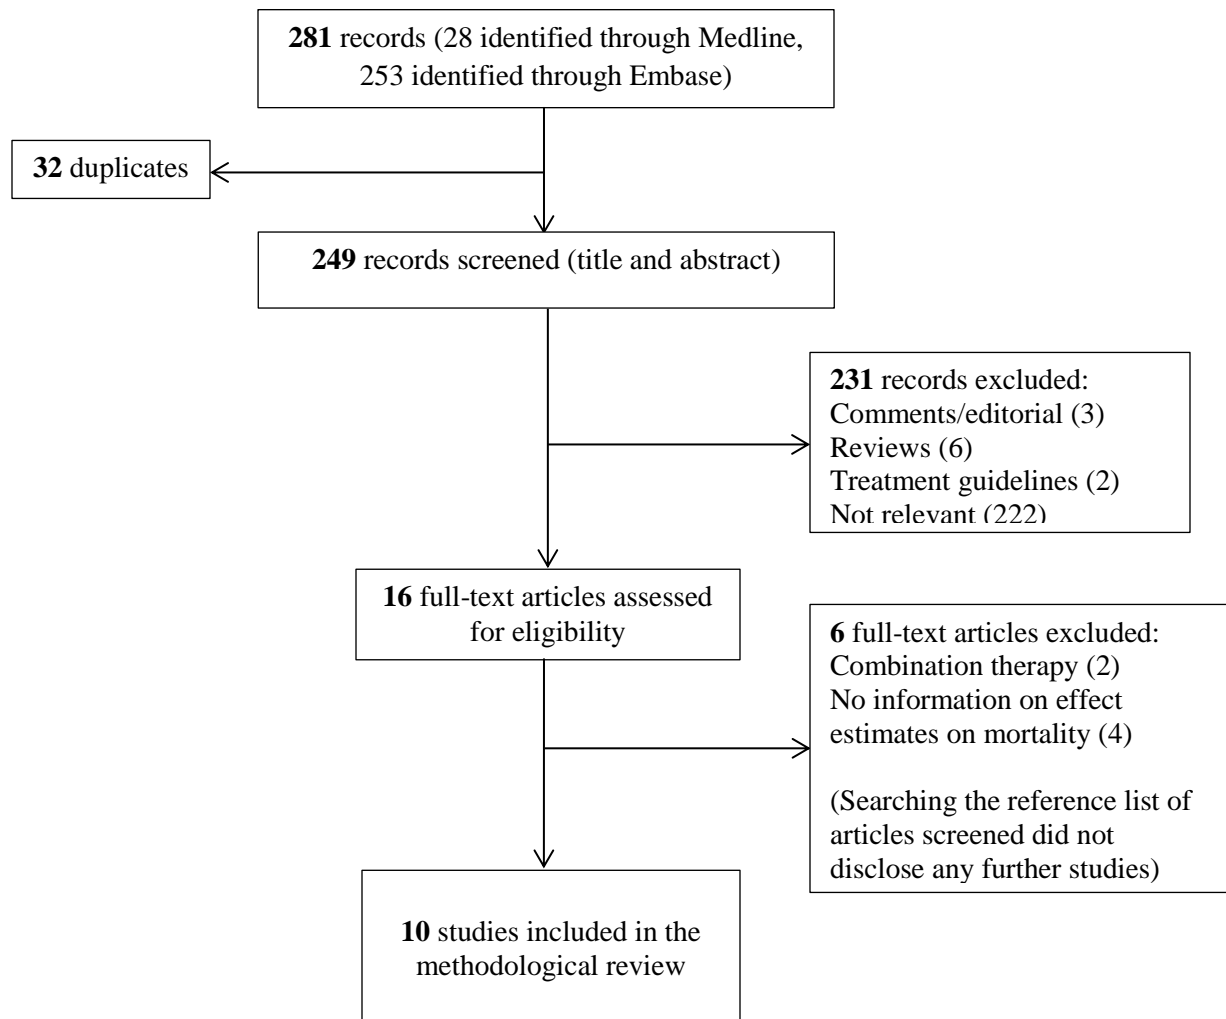

Supplement: inline-supplementary-material-2 [file inline-supplementary-material-2.pdf]
